# Supplementary material for: A study on the thermo-photoisomerization of a liquid crystalline dimer of cyanoazobenzene and naphthalene
Source: Royal Society of Chemistry journal article supplement (doi:10.1039/d4sm01172d), 2025-01-01
Supplement: d4sm01172d1.pdf [file d4sm01172d1.pdf]

## A study on the Thermo-photoisomerization of a liquid crystalline dimer of cyanoazobenzene and naphthalene

Mahima Rabari<sup>a</sup>, A. K. Prajapati\*<sup>a</sup>, S. Mahesha<sup>b</sup>, M. K. Akshaya<sup>b</sup> and Bharat Kumar\*<sup>b</sup>

<sup>a</sup>Department of Chemistry, Faculty of Science, The Maharaja Sayajirao University of Baroda, Vadodara-390 002, India  
Email: akprajapati@yahoo.co.uk

<sup>b</sup>Department of Physics, Central University of Karnataka, Kadaganchi, Kalaburagi, Karnataka-585367, India  
Email ID: bharat@cuk.ac.in

### Electronic Supplementary Information

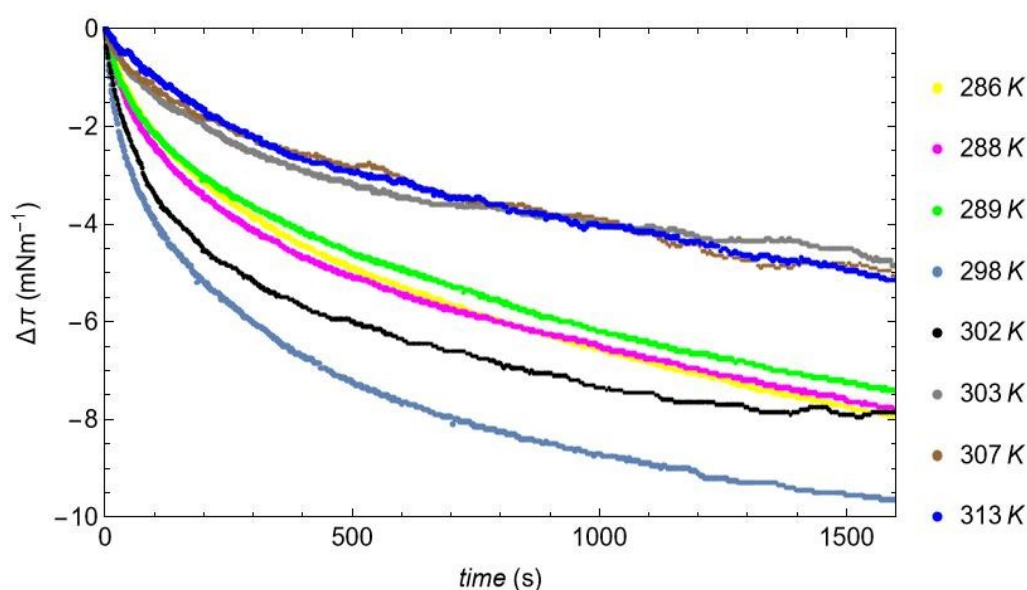

**Fig. S1: Plot of the variation of surface pressure as a function of time as an evidence for thermal isomerization**

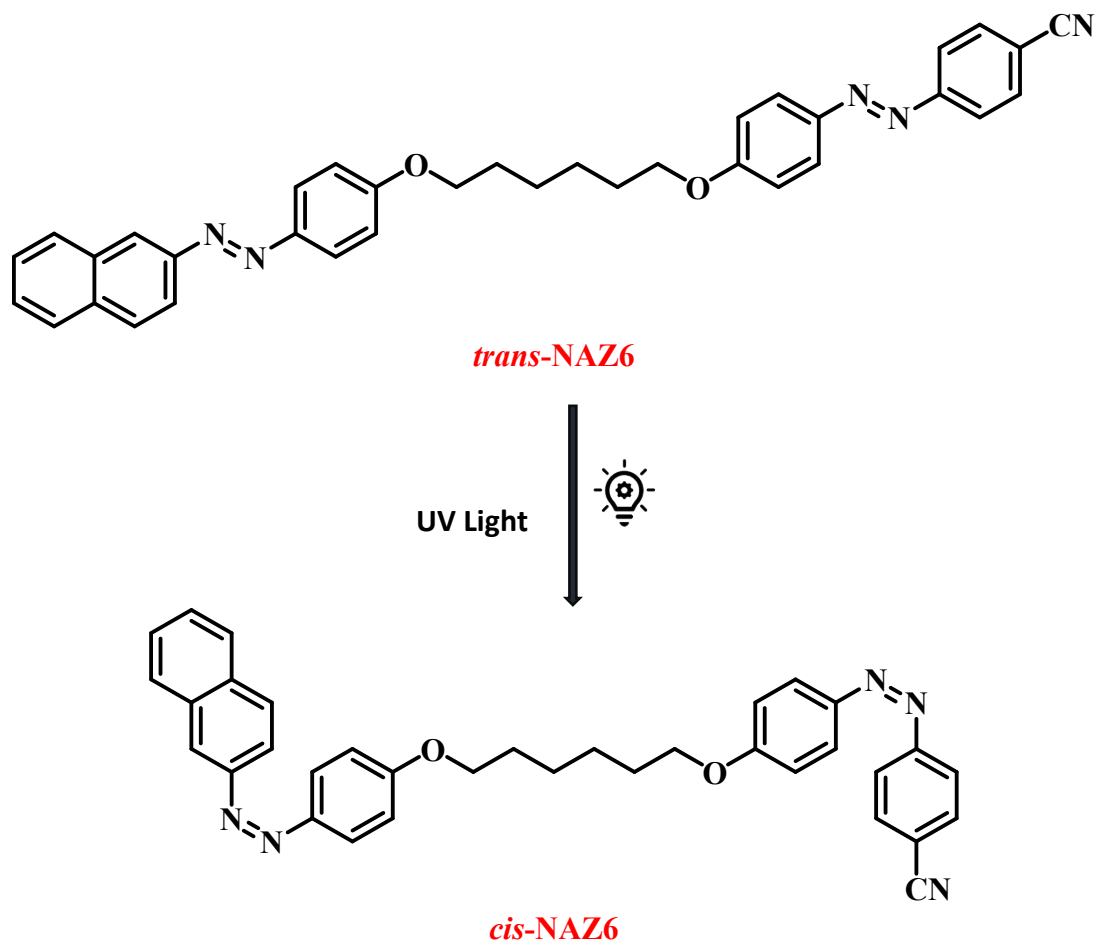

**Fig. S2: Compound NAZ-6 in both cis and trans configuration**
